# Supplementary material
Source: PubMed Central journal article supplement (PMC1891269)
Supplement: pnas_0703737104_8.pdf [file pnas_0703737104_8.pdf]

| <i>E. coli-S. enterica</i> |           |            | Human-Mouse |           |            | Human-Chicken |           |            |
|----------------------------|-----------|------------|-------------|-----------|------------|---------------|-----------|------------|
| Mutation                   | Frequency | Rank Order | Mutation    | Frequency | Rank Order | Mutation      | Frequency | Rank Order |
| IV                         | 377       | 1          | AT          | 3548      | 1          | IV            | 11422     | 1          |
| IL                         | 294       | 2          | IV          | 3431      | 2          | DE            | 10726     | 2          |
| AS                         | 290       | 3          | KR          | 3271      | 3          | KR            | 10129     | 3          |
| DE                         | 257       | 4          | PS          | 3107      | 4          | AS            | 9134      | 4          |
| AT                         | 237       | 5          | DE          | 2942      | 5          | ST            | 8575      | 5          |
| ST                         | 216       | 6          | AV          | 2928      | 6          | AT            | 7148      | 6          |
| LV                         | 186       | 7          | ST          | 2786      | 7          | LV            | 6841      | 7          |
| AV                         | 173       | 8          | NS          | 2442      | 8          | IL            | 6508      | 8          |
| KR                         | 162       | 9          | AS          | 2410      | 9          | NS            | 6267      | 9          |
| EQ                         | 160       | 10         | LV          | 2383      | 10         | AV            | 5870      | 10         |
| LM                         | 150       | 11         | FL          | 2200      | 11         | PS            | 5793      | 11         |
| QR                         | 145       | 12         | EK          | 2188      | 12         | GS            | 4896      | 12         |
| AE                         | 142       | 13         | QR          | 2152      | 13         | FL            | 4591      | 13         |
| DN                         | 137       | 14         | LP          | 2072      | 14         | EQ            | 4163      | 14         |
| KQ                         | 125       | 15         | GS          | 2003      | 15         | LM            | 4155      | 15         |
| NS                         | 121       | 16         | EG          | 1760      | 16         | AP            | 4044      | 16         |
| FL                         | 120       | 17         | EQ          | 1747      | 17         | QR            | 3926      | 17         |
| FY                         | 111       | 18         | DN          | 1683      | 18         | AG            | 3910      | 18         |
| AG                         | 98        | 19         | IL          | 1640      | 19         | KQ            | 3871      | 19         |
| HR                         | 95        | 20         | IT          | 1478      | 20         | DN            | 3370      | 20         |
| IM                         | 93        | 21         | LS          | 1454      | 21         | EK            | 3322      | 21         |
| HQ                         | 91        | 22         | KQ          | 1426      | 22         | FY            | 3252      | 22         |
| AP                         | 91        | 22         | AP          | 1324      | 23         | HQ            | 3105      | 23         |
| TV                         | 83        | 24         | GR          | 1321      | 24         | TV            | 3098      | 24         |
| GS                         | 81        | 25         | AG          | 1314      | 25         | AE            | 2677      | 25         |
| RS                         | 74        | 26         | HQ          | 1275      | 26         | LP            | 2604      | 26         |
| PS                         | 70        | 27         | DG          | 1273      | 27         | PQ            | 2572      | 27         |
| LQ                         | 70        | 27         | MV          | 1216      | 28         | PT            | 2559      | 28         |
| AD                         | 69        | 29         | TV          | 1212      | 29         | EG            | 2544      | 29         |
| KN                         | 68        | 30         | LM          | 1210      | 30         | LS            | 2542      | 30         |
| IT                         | 67        | 31         | RS          | 1108      | 31         | IT            | 2438      | 31         |
| EK                         | 65        | 32         | PT          | 1098      | 32         | MV            | 2311      | 32         |
| AL                         | 65        | 32         | AE          | 1050      | 33         | AL            | 2272      | 33         |
| AQ                         | 64        | 34         | KN          | 1049      | 34         | DG            | 2158      | 34         |
| LR                         | 63        | 35         | HR          | 1018      | 35         | KN            | 2142      | 35         |
| KS                         | 59        | 36         | PQ          | 989       | 36         | NT            | 2044      | 36         |
| QS                         | 58        | 37         | LQ          | 947       | 37         | LQ            | 2038      | 37         |
| DG                         | 58        | 37         | HY          | 945       | 38         | HR            | 2005      | 38         |
| HN                         | 57        | 39         | IM          | 893       | 39         | RS            | 1982      | 39         |
| KT                         | 56        | 40         | KT          | 842       | 40         | IM            | 1931      | 40         |
| AN                         | 56        | 40         | NT          | 804       | 41         | DS            | 1926      | 41         |
| DS                         | 53        | 42         | MT          | 792       | 42         | CS            | 1893      | 42         |
| EN                         | 52        | 43         | FS          | 763       | 43         | SV            | 1829      | 43         |
| NT                         | 51        | 44         | FY          | 741       | 44         | ES            | 1791      | 44         |

|    |    |    |    |     |    |    |      |    |
|----|----|----|----|-----|----|----|------|----|
| NQ | 49 | 45 | DS | 722 | 45 | KS | 1773 | 45 |
| DQ | 49 | 45 | AD | 718 | 46 | KT | 1711 | 46 |
| MV | 48 | 47 | CS | 715 | 47 | HY | 1710 | 47 |
| AK | 48 | 47 | AL | 636 | 48 | GN | 1669 | 48 |
| PQ | 47 | 49 | LR | 634 | 49 | LT | 1646 | 49 |
| GN | 47 | 49 | GV | 621 | 50 | HN | 1621 | 50 |
| ET | 45 | 51 | AI | 618 | 51 | AI | 1568 | 51 |
| HY | 44 | 52 | HN | 605 | 52 | GR | 1543 | 52 |
| ES | 44 | 52 | KS | 582 | 53 | QS | 1500 | 53 |
| EG | 44 | 52 | ER | 560 | 54 | MT | 1377 | 54 |
| NR | 43 | 55 | SV | 545 | 55 | AD | 1354 | 55 |
| AR | 43 | 55 | PR | 541 | 56 | GT | 1346 | 56 |
| AI | 42 | 57 | LT | 531 | 57 | EN | 1305 | 57 |
| QT | 41 | 58 | EV | 530 | 58 | GV | 1238 | 58 |
| DT | 38 | 59 | GN | 525 | 59 | LR | 1230 | 59 |
| PT | 34 | 60 | RT | 520 | 60 | ER | 1209 | 60 |
| LS | 34 | 60 | HP | 494 | 61 | EV | 1202 | 61 |
| SV | 33 | 62 | IS | 479 | 62 | ET | 1181 | 62 |
| LT | 33 | 62 | HS | 468 | 63 | HS | 1121 | 63 |
| RT | 31 | 64 | FV | 466 | 64 | PV | 1107 | 64 |
| ER | 31 | 64 | GK | 462 | 65 | AK | 1095 | 65 |
| MT | 30 | 66 | FI | 453 | 66 | AN | 1085 | 66 |
| HS | 30 | 66 | ES | 449 | 67 | RT | 1081 | 67 |
| GT | 30 | 66 | ET | 444 | 68 | AQ | 1077 | 68 |
| FI | 30 | 66 | CY | 418 | 69 | FI | 1049 | 69 |
| EV | 30 | 66 | HL | 417 | 70 | IS | 1034 | 70 |
| AM | 29 | 71 | QS | 412 | 71 | FS | 1030 | 71 |
| GR | 27 | 72 | GT | 391 | 72 | FV | 1028 | 72 |
| FV | 26 | 73 | EN | 382 | 73 | NR | 1007 | 73 |
| DK | 26 | 73 | NR | 380 | 74 | AR | 989  | 74 |
| CS | 26 | 73 | SY | 363 | 75 | GK | 986  | 75 |
| HK | 24 | 76 | DH | 359 | 76 | EP | 961  | 76 |
| EP | 23 | 77 | DK | 358 | 77 | HP | 944  | 77 |
| LP | 21 | 78 | GQ | 331 | 78 | PR | 926  | 78 |
| DH | 20 | 79 | AM | 330 | 79 | AM | 908  | 79 |
| AH | 20 | 79 | PV | 328 | 80 | NQ | 888  | 80 |
| HL | 19 | 81 | CR | 314 | 81 | GP | 869  | 81 |
| GQ | 19 | 81 | RW | 310 | 82 | HL | 856  | 82 |
| DP | 19 | 81 | DV | 310 | 82 | DK | 829  | 83 |
| PV | 18 | 84 | AK | 294 | 84 | DQ | 799  | 84 |
| IS | 18 | 84 | DT | 292 | 85 | QT | 771  | 85 |
| NY | 17 | 86 | AR | 289 | 86 | EL | 771  | 85 |
| WY | 16 | 87 | AN | 281 | 87 | GQ | 768  | 87 |
| QV | 16 | 87 | KM | 279 | 88 | SY | 740  | 88 |
| PR | 16 | 87 | LW | 257 | 89 | KP | 734  | 89 |
| KP | 16 | 87 | CH | 254 | 90 | CY | 734  | 89 |
| HT | 16 | 87 | CG | 253 | 91 | DT | 722  | 91 |
| CR | 16 | 87 | EP | 246 | 92 | KL | 719  | 92 |

|    |    |     |    |     |     |    |     |     |
|----|----|-----|----|-----|-----|----|-----|-----|
| AF | 16 | 87  | CF | 236 | 93  | DH | 654 | 93  |
| LY | 15 | 94  | NQ | 233 | 94  | KV | 636 | 94  |
| IK | 15 | 94  | DQ | 227 | 95  | HK | 617 | 95  |
| EL | 15 | 94  | IN | 222 | 96  | MS | 605 | 96  |
| DR | 15 | 94  | KV | 214 | 97  | GL | 604 | 97  |
| RY | 14 | 98  | AQ | 214 | 97  | LY | 596 | 98  |
| MS | 14 | 98  | GP | 211 | 99  | QV | 585 | 99  |
| MQ | 14 | 98  | EL | 210 | 100 | CG | 580 | 100 |
| LW | 14 | 98  | RV | 206 | 101 | EH | 577 | 101 |
| GK | 14 | 98  | QT | 206 | 101 | CR | 572 | 102 |
| FM | 14 | 98  | GL | 204 | 103 | AC | 549 | 103 |
| MR | 13 | 104 | KL | 203 | 104 | AF | 531 | 104 |
| KV | 13 | 104 | IK | 202 | 105 | RV | 522 | 105 |
| KL | 13 | 104 | QW | 196 | 106 | CF | 522 | 105 |
| HP | 13 | 104 | GH | 186 | 107 | DV | 493 | 107 |
| EI | 13 | 104 | MR | 183 | 108 | NP | 480 | 108 |
| EH | 13 | 104 | IR | 181 | 109 | DP | 479 | 109 |
| FS | 12 | 110 | EH | 178 | 110 | CL | 478 | 110 |
| DV | 11 | 111 | CL | 178 | 110 | NV | 466 | 111 |
| CG | 11 | 111 | FP | 177 | 112 | IP | 460 | 112 |
| TY | 10 | 113 | NY | 175 | 113 | KM | 459 | 113 |
| SY | 10 | 113 | LY | 171 | 114 | DR | 454 | 114 |
| IR | 10 | 113 | IP | 170 | 115 | AH | 439 | 115 |
| IQ | 10 | 113 | HK | 169 | 116 | NY | 432 | 116 |
| HV | 10 | 113 | KP | 168 | 117 | HT | 425 | 117 |
| GL | 10 | 113 | RY | 154 | 118 | IK | 422 | 118 |
| FH | 10 | 113 | MS | 154 | 118 | IN | 415 | 119 |
| CL | 10 | 113 | DR | 153 | 120 | GH | 408 | 120 |
| CF | 10 | 113 | DY | 148 | 121 | GI | 388 | 121 |
| GP | 9  | 122 | AF | 147 | 122 | CH | 384 | 122 |
| FT | 9  | 122 | DP | 144 | 123 | LN | 381 | 123 |
| DL | 9  | 122 | NP | 137 | 124 | QY | 372 | 124 |
| CY | 9  | 122 | FT | 137 | 124 | FH | 372 | 124 |
| LN | 8  | 126 | FH | 135 | 126 | FP | 369 | 126 |
| IY | 8  | 126 | QV | 132 | 127 | RW | 358 | 127 |
| GH | 8  | 126 | GW | 131 | 128 | LW | 357 | 128 |
| FW | 8  | 126 | QY | 128 | 129 | FT | 349 | 129 |
| CT | 8  | 126 | SW | 125 | 130 | CT | 347 | 130 |
| AC | 8  | 126 | HT | 125 | 130 | EI | 336 | 131 |
| RV | 7  | 132 | GI | 123 | 132 | MR | 329 | 132 |
| QY | 7  | 132 | EM | 123 | 132 | IR | 325 | 133 |
| NV | 7  | 132 | AH | 112 | 134 | MQ | 323 | 134 |
| KM | 7  | 132 | CW | 111 | 135 | RY | 306 | 135 |
| IP | 7  | 132 | MP | 109 | 136 | FM | 296 | 136 |
| GY | 7  | 132 | DL | 109 | 136 | CV | 289 | 137 |
| EM | 7  | 132 | NV | 106 | 138 | CN | 286 | 138 |
| CQ | 7  | 132 | EI | 98  | 139 | EM | 281 | 139 |
| SW | 6  | 140 | AC | 97  | 140 | AY | 281 | 139 |

|    |   |     |    |    |     |    |     |     |
|----|---|-----|----|----|-----|----|-----|-----|
| RW | 6 | 140 | GM | 95 | 141 | DL | 279 | 141 |
| IN | 6 | 140 | CP | 93 | 142 | MP | 276 | 142 |
| GV | 6 | 140 | PY | 91 | 143 | CP | 252 | 143 |
| EY | 6 | 140 | CQ | 88 | 144 | IQ | 248 | 144 |
| CN | 6 | 140 | MQ | 87 | 145 | CQ | 248 | 144 |
| VY | 5 | 146 | LN | 85 | 146 | DY | 244 | 146 |
| NP | 5 | 146 | FR | 80 | 147 | PY | 223 | 147 |
| GI | 5 | 146 | DI | 80 | 147 | HV | 210 | 148 |
| DY | 5 | 146 | CV | 80 | 147 | GM | 208 | 149 |
| CV | 5 | 146 | FM | 72 | 150 | FG | 205 | 150 |
| AY | 5 | 146 | CT | 72 | 150 | VY | 204 | 151 |
| PY | 4 | 152 | IQ | 70 | 152 | TY | 194 | 152 |
| KY | 4 | 152 | HV | 68 | 153 | SW | 194 | 152 |
| FR | 4 | 152 | CN | 67 | 154 | HI | 185 | 154 |
| DI | 4 | 152 | GY | 65 | 155 | DI | 184 | 155 |
| CI | 4 | 152 | VY | 60 | 156 | IY | 176 | 156 |
| AW | 4 | 152 | MN | 59 | 157 | CI | 173 | 157 |
| QW | 3 | 158 | FN | 55 | 158 | QW | 171 | 158 |
| MP | 3 | 158 | KY | 53 | 159 | FQ | 169 | 159 |
| HM | 3 | 158 | FG | 53 | 159 | FR | 168 | 160 |
| HI | 3 | 158 | TY | 52 | 161 | EY | 164 | 161 |
| GW | 3 | 158 | FQ | 52 | 161 | CW | 163 | 162 |
| FQ | 3 | 158 | KW | 50 | 163 | FW | 162 | 163 |
| FN | 3 | 158 | HI | 50 | 163 | FN | 157 | 164 |
| FG | 3 | 158 | EY | 49 | 165 | GY | 155 | 165 |
| DM | 3 | 158 | FW | 48 | 166 | GW | 150 | 166 |
| CK | 3 | 158 | IY | 47 | 167 | KY | 147 | 167 |
| CH | 3 | 158 | CD | 47 | 167 | EF | 146 | 168 |
| MN | 2 | 169 | AY | 47 | 167 | CK | 143 | 169 |
| IW | 2 | 169 | PW | 45 | 170 | MN | 141 | 170 |
| GM | 2 | 169 | DF | 42 | 171 | CD | 140 | 171 |
| FP | 2 | 169 | MW | 40 | 172 | CE | 132 | 172 |
| DF | 2 | 169 | VW | 38 | 173 | DF | 124 | 173 |
| CW | 2 | 169 | EW | 37 | 174 | FK | 118 | 174 |
| CD | 2 | 169 | WY | 36 | 175 | WY | 106 | 175 |
| VW | 1 | 176 | AW | 33 | 176 | KW | 101 | 176 |
| TW | 1 | 176 | CI | 32 | 177 | DM | 101 | 176 |
| MY | 1 | 176 | EF | 31 | 178 | AW | 86  | 178 |
| MW | 1 | 176 | HW | 27 | 179 | VW | 81  | 179 |
| HW | 1 | 176 | DM | 27 | 179 | EW | 74  | 180 |
| EW | 1 | 176 | FK | 25 | 181 | HW | 73  | 181 |
| EF | 1 | 176 | TW | 22 | 182 | CM | 71  | 182 |
| CP | 1 | 176 | CE | 22 | 182 | HM | 69  | 183 |
| CE | 1 | 176 | NW | 17 | 184 | PW | 64  | 184 |
|    |   |     | HM | 17 | 184 | MY | 64  | 184 |
|    |   |     | CK | 17 | 184 | MW | 58  | 186 |
|    |   |     | MY | 14 | 187 | IW | 56  | 187 |
|    |   |     | CM | 12 | 188 | TW | 52  | 188 |

|    |    |     |    |    |     |
|----|----|-----|----|----|-----|
| IW | 10 | 189 | DW | 36 | 189 |
| DW | 9  | 190 | NW | 26 | 190 |
